# Supplementary material
Source: Springer Nature journal article supplement (https://www.springermedizin.de/resource/supplementary/12874_2011_813_MOESM7_ESM.pdf/9432906)

Contrasts of Predictive Margins: OLS, raw-scale

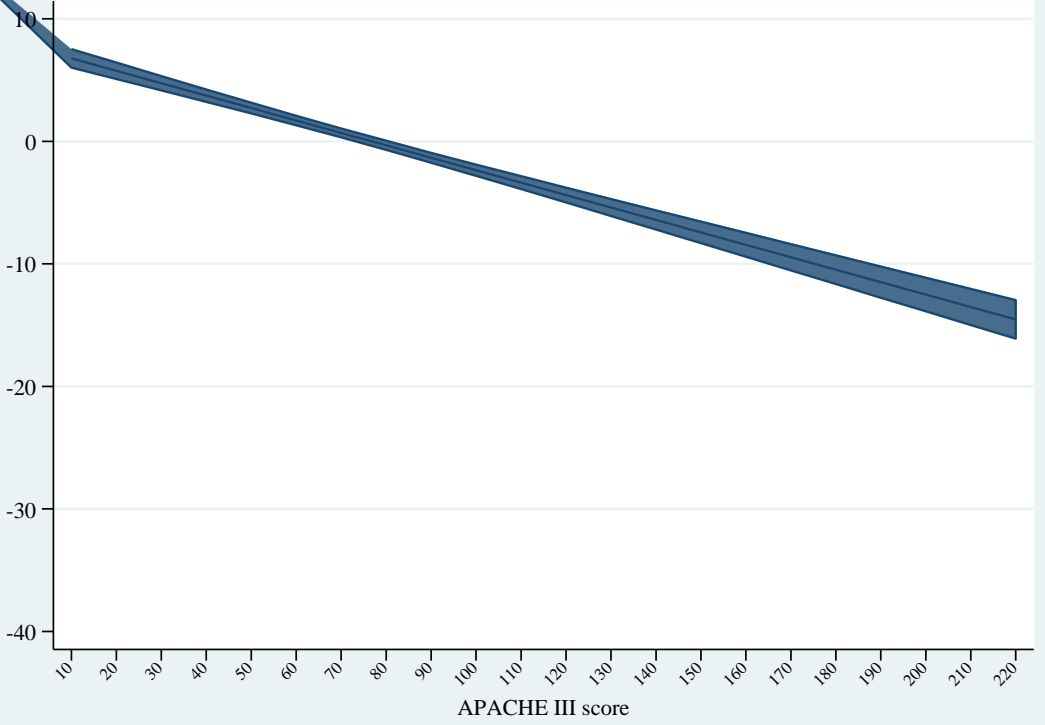

Contrasts of Predictive Margins: GLM log-Gaussian

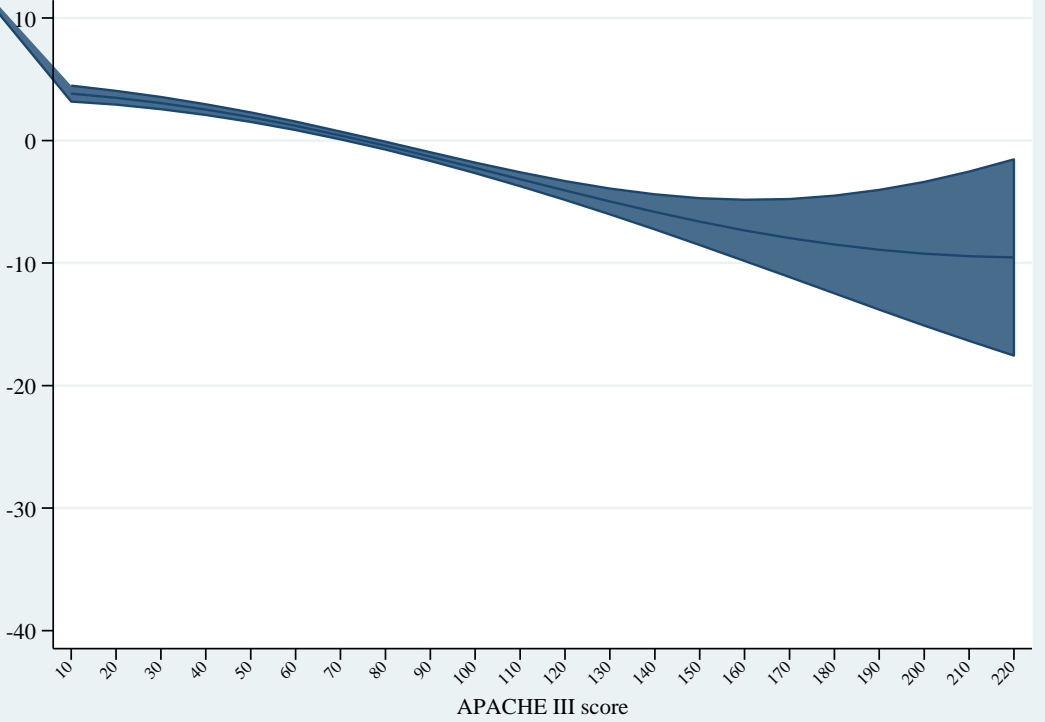

Supplement: MOESM7 [file 9432906]
